# Supplementary material
Source: PubMed Central journal article supplement (PMC9893338)
Supplement: EIJ-D-20-00935_Rodriguez-Leor_SD.pdf [file EIJ-D-20-00935_Rodriguez-Leor_SD.pdf]

## **Supplementary data**

### **Supplementary Appendix 1. Working group on the Infarct Code of the Spanish Interventional Cardiology Association Investigators**

#### ***Key personnel and participating study sites:***

Manuel Villa, Hospital Universitario Virgen del Rocío; Rafael Ruíz-Salmerón, Hospital Universitario Virgen Macarena; Francisco Molano, Hospital Universitario Virgen de Valme; Carlos Sánchez, Hospital Universitario General de Málaga; Erika Muñoz-García, Hospital Universitario Virgen de la Victoria; Luís Iñigo, Hospital Costa del Sol; Juan Herrador, Hospital Universitario de Jaén; Antonio Gómez-Menchero, Hospital Universitario Juan Ramón Jiménez; Eduardo Molina, Hospital Universitario Virgen de las Nieves; Juan Caballero, Hospital Universitario San Cecilio; Soledad Ojeda, Hospital Universitario Reina Sofía; Mérida Cárdenas, Hospital Punta de Europa; Livia Gheorghe, Hospital Universitario Puerta del Mar; Jesús Oneto, Hospital Universitario de Jerez de la Frontera; Francisco Morales, Hospital Universitario de Puerto Real; Félix Valencia, Hospital Universitario Torrecárdenas; José Ramón Ruíz, Hospital Clínico Universitario Lozano Blesa; Jose Antonio Diarte, Hospital Universitario Miguel Servet; Pablo Avanzas, Hospital Universitario Central de Asturias; Juan Rondán, Hospital Universitario de Cabueñes; Vicente Peral, Hospital Universitari Son Espases; Lucía Vera Pernasetti, Policlínica Nuestra Señora del Rosario; Julio Hernández, Hospital Universitario Nuestra Señora de Candelaria; Francisco Bosa, Hospital Universitario de Canarias; Pedro Luís Martín Lorenzo, Hospital Universitario de Gran Canaria Doctor Negrín; Francisco Jiménez, Hospital Insular de Gran Canaria; Jose M. de la Torre Hernandez, Hospital Universitario Marqués de Valdecilla de Santander; Jesús Jiménez-Mazuecos, Hospital General Universitario de Albacete; Fernando Lozano, Hospital General Universitario de Ciudad Real; José Moreu, Complejo Hospitalario de Toledo; Enrique Novo, Hospital Universitario de Guadalajara; Javier Robles, Hospital Universitario de Burgos; Javier Martín Moreiras, Hospital de Universitario de Salamanca; Felipe Fernández-Vázquez, Hospital de León; Ignacio J. Amat-Santos, CIBERCV Hospital Clínico Universitario de Valladolid; Joan Antoni Gómez-Hospital, Hospital Universitari de Bellvitge; Joan García-Picart, Hospital de la Santa Creu i Sant Pau; Bruno García del Blanco, Hospital Universitari Vall d'Hebron; Ander Regueiro,

Hospital Clínic de Barcelona; Xavier Carrillo-Suarez, Hospital Universitari Germans Trias i Pujol; Helena Tizón, Hospital del Mar; Mohsen Mohandes, Hospital Universitari Joan XXIII; Juan Casanova, Hospital Universitari Arnau de Vilanova; Victor Agudelo-Montañez, Hospital Universitari de Girona Josep Trueta; Juan Francisco Muñoz, Hospital Universitari Mútua de Tarrassa; Juan Franco, Hospital Universitario Fundación Jiménez Díaz; Roberto del Castillo, Hospital Universitario Fundación Alcorcón; Pablo Salinas, Hospital Clínico San Carlos y Hospital Príncipe de Asturias; Jaime Elizaga, Hospital General Universitario Gregorio Marañón; Fernando Sarnago, Hospital Universitario 12 de Octubre; Santiago Jiménez-Valero, Hospital Universitario La Paz; Fernando Rivero, Hospital Universitario de La Princesa; Juan Francisco Oteo, Hospital Universitario Puerta de Hierro Majadahonda; Eduardo Alegría-Barrero, Hospital Universitario de Torrejón-Universidad Francisco de Vitoria; Angel Sánchez-Recalde, Hospital Ramón y Cajal; Valeriano Ruíz, Complejo Hospitalario de Navarra; Eduardo Pinar, Hospital Virgen de la Arrixaca; Luciano Consuegra-Sanchez, Hospital Universitario Santa Lucía de Cartagena; Ana Planas, Hospital General Universitario de Castellón; Bernabé López Ledesma, Hospital Universitario y Politécnico La Fe; Alberto Berenguer, Hospital General Universitario de Valencia; Agustín Fernández-Cisnal, Hospital Clínico Universitario de Valencia; Pablo Aguar, Hospital Universitario Dr Peset; Francisco Pomar, Hospital Universitario de la Ribera; Miguel Jerez, Hospital de Manises; Francisco Torres, Hospitales de Torrevieja-Elche-Vinalopó; Ricardo García, Hospital General Universitario de Elche; Araceli Frutos, Hospital General Universitario de San Juan de Alicante; Juan Miguel Ruíz Nodar, Hospital General Universitario de Alicante; Koldobika García, Hospital Universitario de Cruces; Roberto Sáez, Hospital de Basurto; Alfonso Torres, Hospital Universitario Araba; Miren Tellería, Hospital Universitario Donostia; Mario Sadaba, Hospital de Galdakao-Usansolo; José Ramón López Mínguez, Complejo Hospitalario Universitario de Badajoz; Juan Carlos Rama Merchán, Hospital de Mérida; Javier Portales, Complejo Hospitalario Universitario de Cáceres; Ramiro Trillo, Hospital Clínico Universitario Santiago de Compostela; Guillermo Aldama, Complejo Hospitalario Universitario de A Coruña; Saleta Fernández, Complejo Hospitalario Universitario de Vigo; Melisa Santás, Hospital Universitario Lucus Augusti; Maria Pilar Portero Perez, Hospital San Pedro de Logroño.

**Supplementary Appendix 2. STROBE Statement—Checklist of items that should be included in reports of cohort studies**

|                           | <b>Item No</b> | <b>Recommendation</b>                                                                                                                                                                                                                                                                                                  | <b>Page No</b> |
|---------------------------|----------------|------------------------------------------------------------------------------------------------------------------------------------------------------------------------------------------------------------------------------------------------------------------------------------------------------------------------|----------------|
| <b>Title and abstract</b> | 1              | (a) Indicate the study’s design with a commonly used term in the title or the abstract                                                                                                                                                                                                                                 | 1              |
|                           |                | (b) Provide in the abstract an informative and balanced summary of what was done and what was found                                                                                                                                                                                                                    | 3              |
| <b>Introduction</b>       |                |                                                                                                                                                                                                                                                                                                                        |                |
| Background/rationale      | 2              | Explain the scientific background and rationale for the investigation being reported                                                                                                                                                                                                                                   | 6              |
| Objectives                | 3              | State specific objectives, including any prespecified hypotheses                                                                                                                                                                                                                                                       | 6              |
| <b>Methods</b>            |                |                                                                                                                                                                                                                                                                                                                        |                |
| Study design              | 4              | Present key elements of study design early in the paper                                                                                                                                                                                                                                                                | 7              |
| Setting                   | 5              | Describe the setting, locations, and relevant dates, including periods of recruitment, exposure, follow-up, and data collection                                                                                                                                                                                        | 7              |
| Participants              | 6              | (a) Give the eligibility criteria, and the sources and methods of selection of participants. Describe methods of follow-up<br>(b) For matched studies, give matching criteria and number of exposed and unexposed                                                                                                      | 7              |
| Variables                 | 7              | Clearly define all outcomes, exposures, predictors, potential confounders, and effect modifiers. Give diagnostic criteria, if applicable                                                                                                                                                                               | 7              |
| Data sources/measurement  | 8*             | For each variable of interest, give sources of data and details of methods of assessment (measurement). Describe comparability of assessment methods if there is more than one group                                                                                                                                   | 7              |
| Bias                      | 9              | Describe any efforts to address potential sources of bias                                                                                                                                                                                                                                                              | 7              |
| Study size                | 10             | Explain how the study size was arrived at                                                                                                                                                                                                                                                                              |                |
| Quantitative variables    | 11             | Explain how quantitative variables were handled in the analyses. If applicable, describe which groupings were chosen and why                                                                                                                                                                                           | 7              |
| Statistical methods       | 12             | (a) Describe all statistical methods, including those used to control for confounding<br>(b) Describe any methods used to examine subgroups and interactions<br>(c) Explain how missing data were addressed<br>(d) If applicable, explain how loss to follow-up was addressed<br>(e) Describe any sensitivity analyses | 7              |
| <b>Results</b>            |                |                                                                                                                                                                                                                                                                                                                        |                |

|                          |     |                                                                                                                                                                                                                                                                                                                                                                                                                 |       |
|--------------------------|-----|-----------------------------------------------------------------------------------------------------------------------------------------------------------------------------------------------------------------------------------------------------------------------------------------------------------------------------------------------------------------------------------------------------------------|-------|
| Participants             | 13* | (a) Report numbers of individuals at each stage of study—e.g., numbers potentially eligible, examined for eligibility, confirmed eligible, included in the study, completing follow-up, and analysed<br>(b) Give reasons for non-participation at each stage<br>(c) Consider use of a flow diagram                                                                                                              | 8     |
| Descriptive data         | 14* | (a) Give characteristics of study participants (e.g., demographic, clinical, social) and information on exposures and potential confounders<br>(b) Indicate number of participants with missing data for each variable of interest<br>(c) Summarise follow-up time (e.g., average and total amount)                                                                                                             | 8     |
| Outcome data             | 15* | Report numbers of outcome events or summary measures over time                                                                                                                                                                                                                                                                                                                                                  | 9     |
| <b>Discussion</b>        |     |                                                                                                                                                                                                                                                                                                                                                                                                                 |       |
| Main results             | 16  | (a) Give unadjusted estimates and, if applicable, confounder-adjusted estimates and their precision (e.g., 95% confidence interval). Make clear which confounders were adjusted for and why they were included<br>(b) Report category boundaries when continuous variables were categorised<br>(c) If relevant, consider translating estimates of relative risk into absolute risk for a meaningful time period | 9     |
| Other analyses           | 17  | Report other analyses done—e.g., analyses of subgroups and interactions, and sensitivity analyses                                                                                                                                                                                                                                                                                                               | 9     |
| <b>Other information</b> |     |                                                                                                                                                                                                                                                                                                                                                                                                                 |       |
| Key results              | 18  | Summarise key results with reference to study objectives                                                                                                                                                                                                                                                                                                                                                        | 10    |
| Limitations              | 19  | Discuss limitations of the study, taking into account sources of potential bias or imprecision. Discuss both direction and magnitude of any potential bias                                                                                                                                                                                                                                                      | 13    |
| Interpretation           | 20  | Give a cautious overall interpretation of results considering objectives, limitations, multiplicity of analyses, results from similar studies, and other relevant evidence                                                                                                                                                                                                                                      | 10-13 |
| Generalisability         | 21  | Discuss the generalisability (external validity) of the study results                                                                                                                                                                                                                                                                                                                                           |       |
| Funding                  | 22  | Give the source of funding and the role of the funders for the present study and, if applicable, for the original study on which the present article is based                                                                                                                                                                                                                                                   | NA    |

\*Give information separately for exposed and unexposed groups.

**Note:** An Explanation and Elaboration article discusses each checklist item and gives methodological background and published examples of transparent reporting. The STROBE checklist is best used in conjunction with this article (freely available on the Web sites of PLoS Medicine at <http://www.plosmedicine.org/>, Annals of Internal Medicine at <http://www.annals.org/>, and Epidemiology at <http://www.epidem.com/>). Information on the STROBE Initiative is available at <http://www.strobe-statement.org>.
